# Supplementary material
Source: PubMed Central journal article supplement (PMC1949004)
Supplement: 7601781s2.pdf [file 7601781s2.pdf]

References:

Harland RM (1991) *In situ* hybridization: an improved whole-mount method for *Xenopus* embryos. *Methods Cell Biol* **36**: 685-695

Kurata T, Ueno N (2003) *Xenopus* Nbx, a novel NK-1 related gene essential for neural crest formation. *Dev Biol* **257**: 30-40

Miwako I, Yamamoto A, Kitamura T, Nagayama K, Ohashi M (2001) Cholesterol requirement for cation-independent mannose 6-phosphate receptor exit from multivesicular late endosomes to the Golgi. *J Cell Sci* **114**: 1765-1776

Yamamoto TS, Takagi C, Hyodo AC, Ueno N (2001) Suppression of head formation by Xmsx-1 through the inhibition of intracellular nodal signaling. *Development* **128**: 2769-2779
